# Supplementary material for: The epitaxial growth of ZnS nanowire arrays and their applications in UV-light detection
Source: Royal Society of Chemistry journal article supplement (doi:10.1039/c1jm13903g), 2011-11-22
Supplement: c1jm13903g.pdf [file c1jm13903g.pdf]

## Supplementary information

### **The Epitaxial Growth of ZnS Nanowire Arrays and Their Applications in UV-Light Detection**

Yao Liang, Hui Liang, Xudong Xiao and Suikong Hark\*

Department of Physics, The Chinese University of Hong Kong, Shatin, Hong Kong,  
China.

E-mail: [skhark@phy.cuhk.edu.hk](mailto:skhark@phy.cuhk.edu.hk)

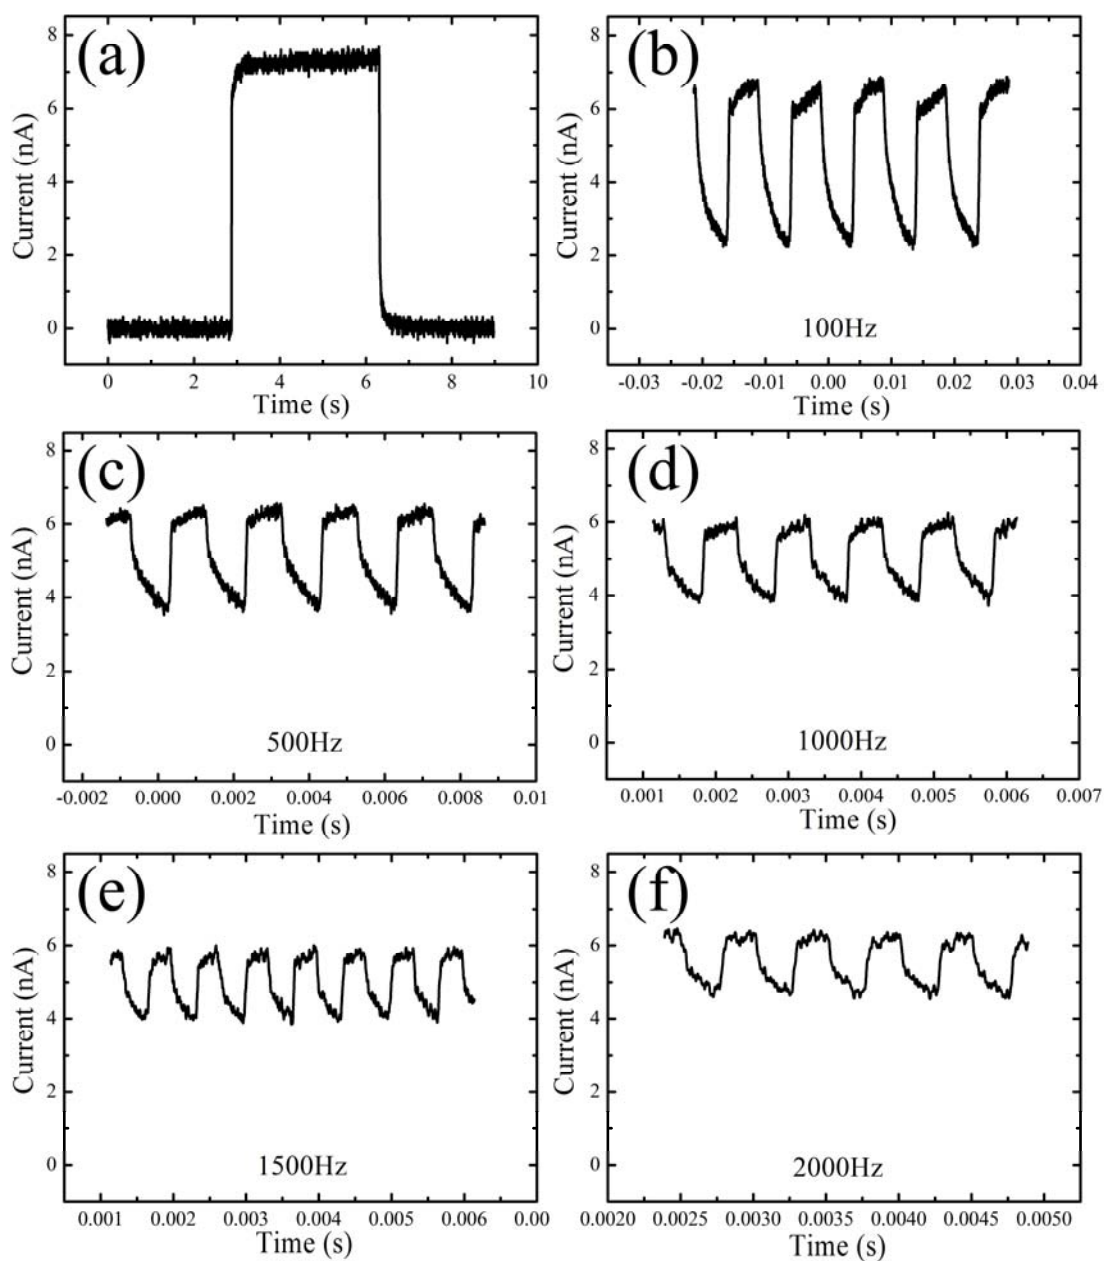

**Fig. S1** Time response of the ZnS NWA photodetector at 1 V under pulsed 325 nm light illumination of  $3.9 \text{ mW cm}^{-2}$  power density.

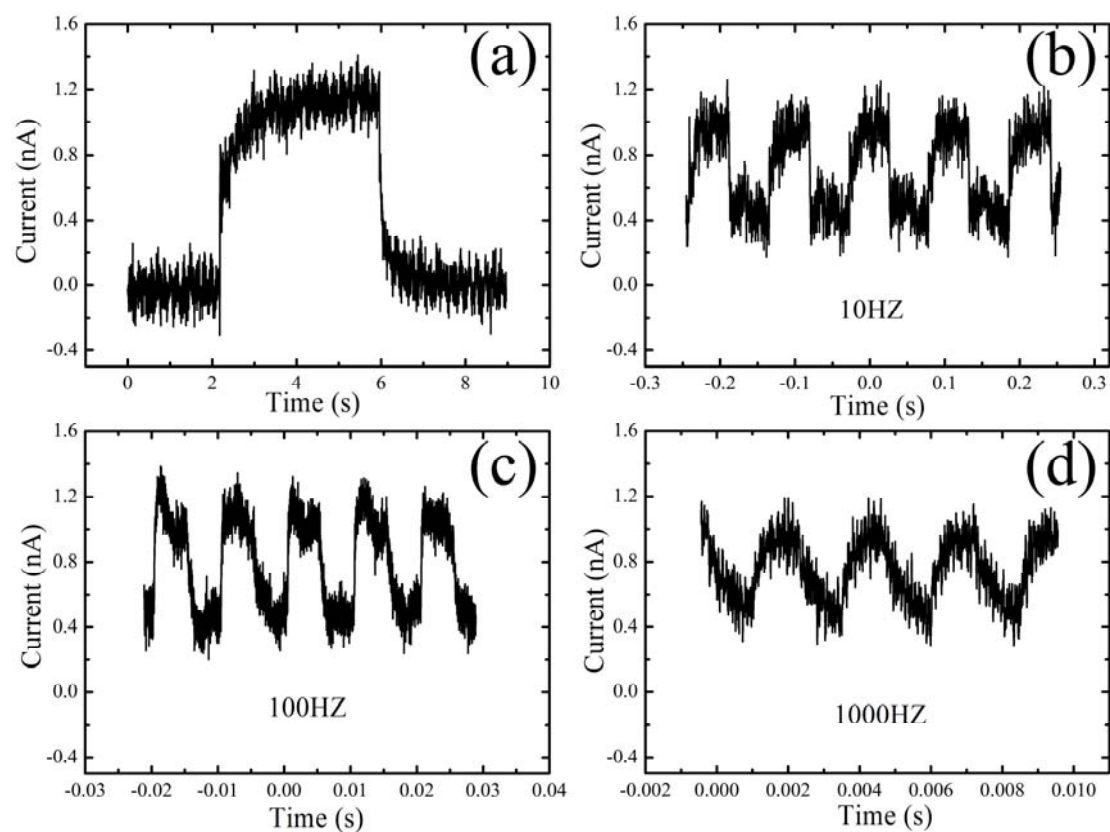

**Fig. S2** Time response of the ZnS NWA photodetector at 1 V under pulsed 325 nm light illumination of  $200 \mu\text{W cm}^{-2}$  power density.

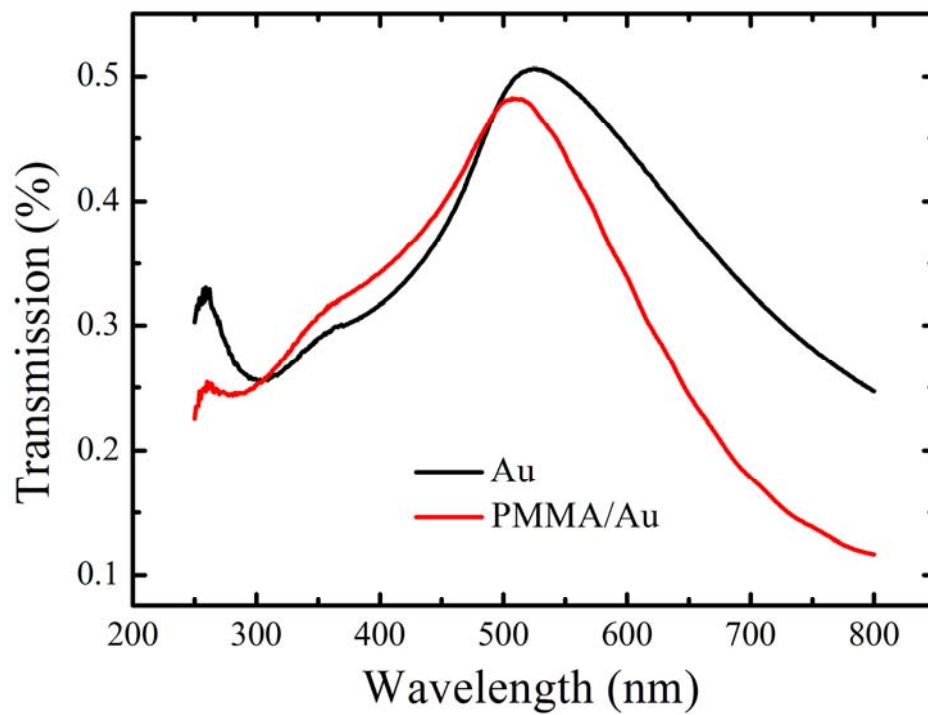

**Fig. S3** Black curve: transmission of the Au electrode. Red curve: transmission of the PMMA /Au layer.
